# Supplementary material
Source: PubMed Central journal article supplement (PMC2798597)
Supplement: NIHMS155019-supplement-Fig_S1.pdf [file NIHMS155019-supplement-Fig_S1.pdf]

**Figure S1. Chun-ling Dai et al.**

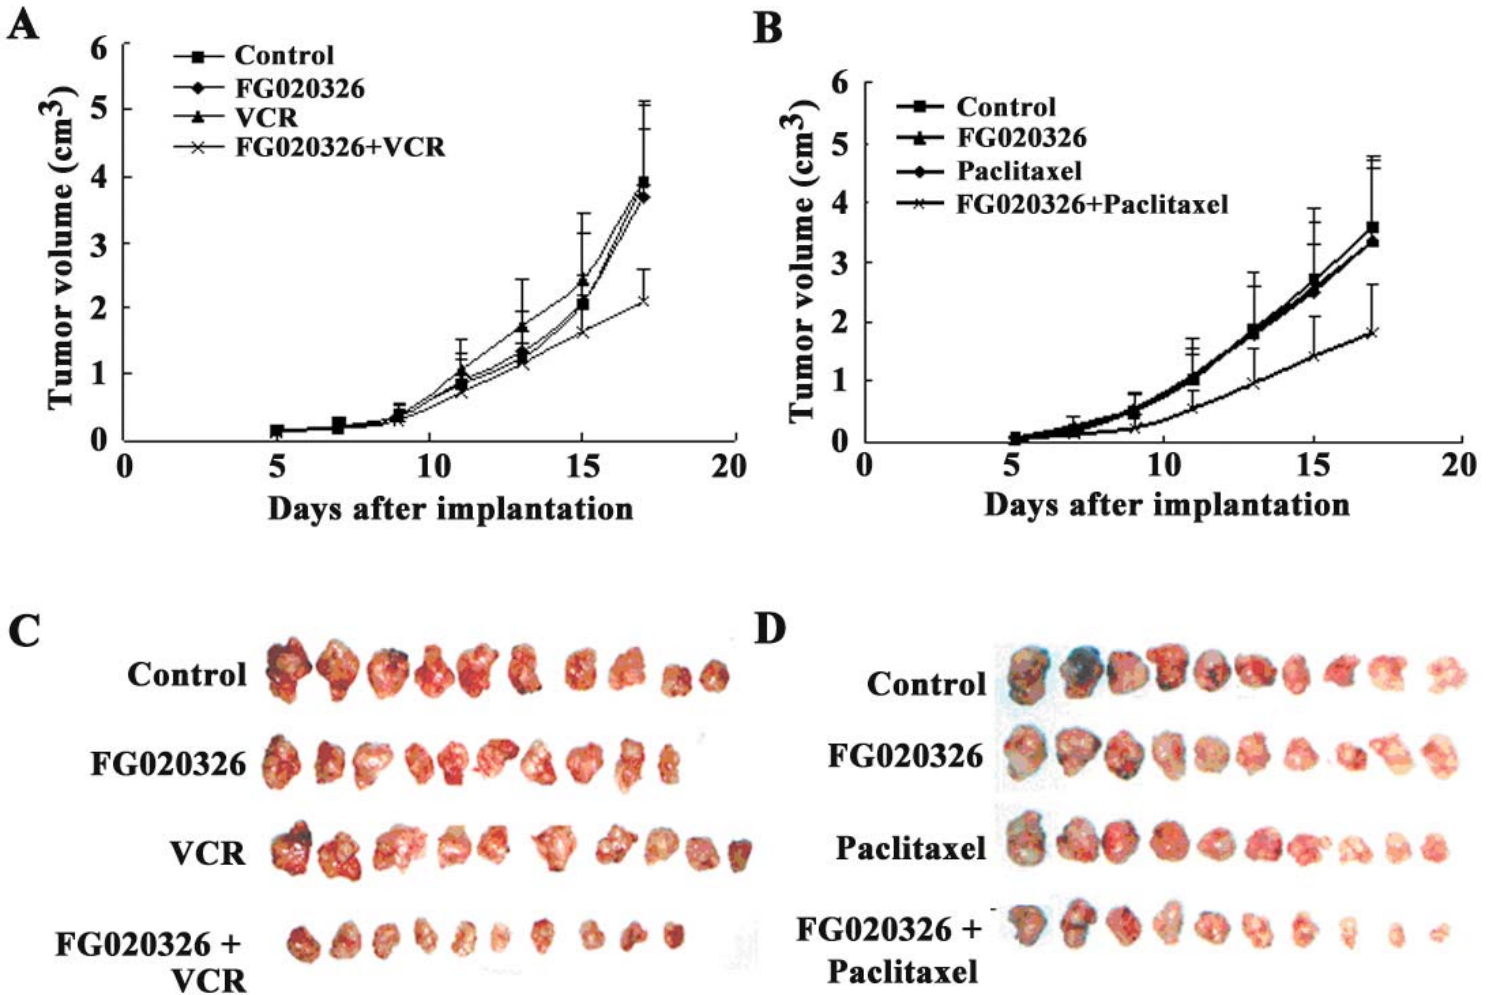

**Figure S1.** Sensitization of VCR or paclitaxel antitumor effect on KBv200 cell xenografts by p.o. coadministration of FG020326. Effects of p.o. administration of FG020326 in combination with VCR (A) or paclitaxel (B) on the growth inhibition of tumors. The experiments were carried out using athymic mice implanted subcutaneously (s.c.) with KBv200 cells. The treatments were administered as described in “Materials and Methods”. Data represent the mean tumor volume for each group  $\pm$  SD in 10 nude mice after implantation. (C and D) The picture showed the tumor size at the end of the experiment.
